# Supplementary material for: A policy-driven multifaceted approach for early childhood physical fitness promotion: impacts on body composition and physical fitness in young Chinese children
Source: PubMed Central journal article supplement (PMC4108008; doi:10.1186/1471-2431-14-118), 2014-05-05
Supplement: 1471-2431-14-118-S3.pdf [file 1471-2431-14-118-S3.pdf]

**Additional file 3 – Changes of reported exercise and fitness assessment in intervention parents and teachers from baseline to posttest**

|                                                                                              |                            | Baseline (%) | Posttest (%) |
|----------------------------------------------------------------------------------------------|----------------------------|--------------|--------------|
| Parent's reported frequency of exercise†±                                                    | No exercise                | 53.3         | 30.2         |
|                                                                                              | Once a week                | 30.8         | 42.3         |
|                                                                                              | Two or more times a week   | 15.9         | 27.6         |
| Parent's reported duration of exercise sessions†±                                            | Exercise <30 min/session   | 54.1         | 9.3          |
|                                                                                              | Exercise 30-60 min/session | 34.7         | 47.4         |
|                                                                                              | Exercise >60 min/session   | 11.2         | 43.3         |
| Parent levels of physical fitness assessment†*                                               | Poor                       | 6.3          | 1.7          |
|                                                                                              | Fair                       | 29.5         | 27.9         |
|                                                                                              | Good                       | 40.6         | 28.5         |
|                                                                                              | Outstanding                | 23.6         | 41.9         |
| Teacher levels of physical fitness assessment†*                                              | Poor                       | 10.7         | 0.0          |
|                                                                                              | Fair                       | 35.7         | 17.9         |
|                                                                                              | Good                       | 21.4         | 50.0         |
|                                                                                              | Outstanding                | 32.1         | 32.1         |
| † positive linear trend based on chi-square test, $\alpha \leq 0.01$                         |                            |              |              |
| ± based on self-reports of physical activities from the parental surveys                     |                            |              |              |
| * based on physical fitness index scores of Chinese Adult Physical Fitness Test Standards[6] |                            |              |              |
